# Supplementary material for: Nitrogen oxides in the global upper troposphere: interpreting cloud-sliced NO 2 observations from the OMI satellite instrument
Source: Copernicus journal article supplement (doi:10.5194/acp-18-17017-2018), 2018-11-30
Supplement: Supplementary file 1 [file acp-18-17017-2018-supplement.pdf]

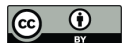

*Supplement of*

## **Nitrogen oxides in the global upper troposphere: interpreting cloud-sliced NO<sub>2</sub> observations from the OMI satellite instrument**

**Eloise A. Marais et al.**

*Correspondence to:* Eloise A. Marais ([eloise.marais@le.ac.uk](mailto:eloise.marais@le.ac.uk))

The copyright of individual parts of the supplement might differ from the CC BY 4.0 License.

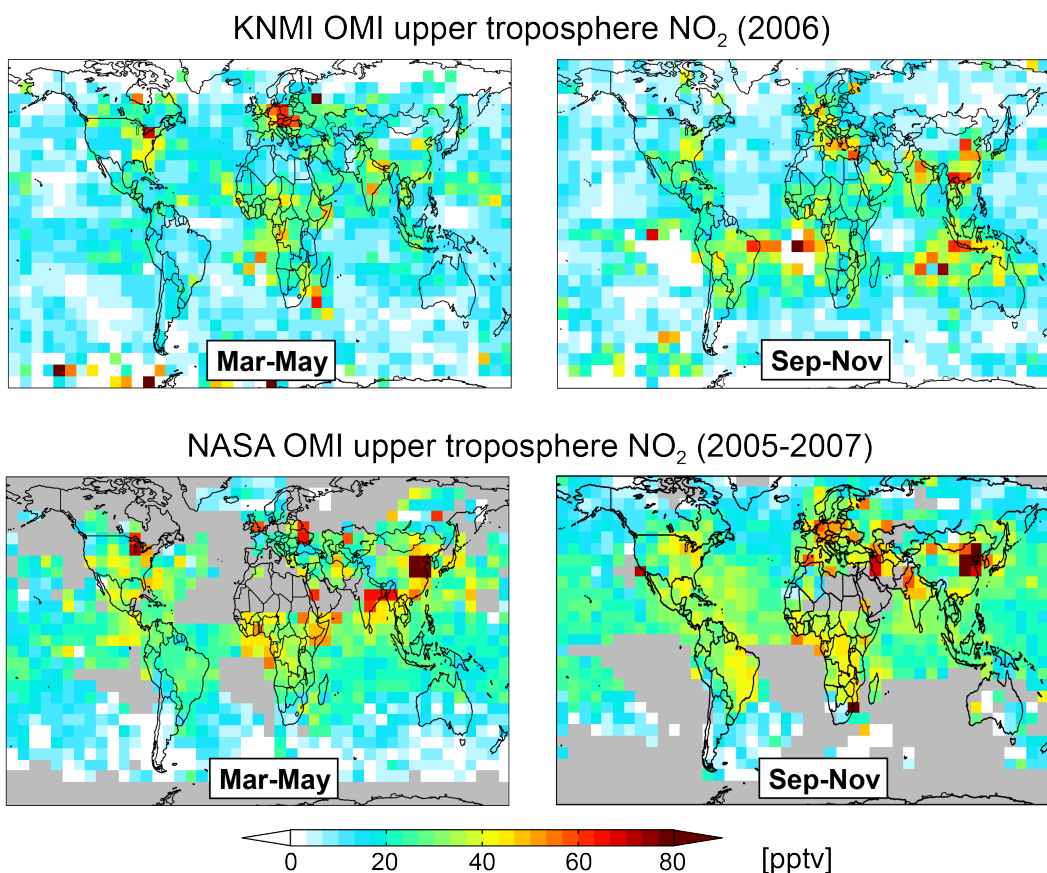

Fig. S1. Upper troposphere (UT) NO<sub>2</sub> from the OMI satellite instrument. Seasonal mean UT NO<sub>2</sub> from KNMI in  
 5 2006 at 330-450 hPa (top) is compared to NASA in 2005-2007 at 280-450 hPa (bottom). Data are at 5° × 8°  
 horizontal resolution for March-May (left) and September-November (right). Grey areas indicate no data and, for  
 NASA, scenes with fewer than 50 measurements.

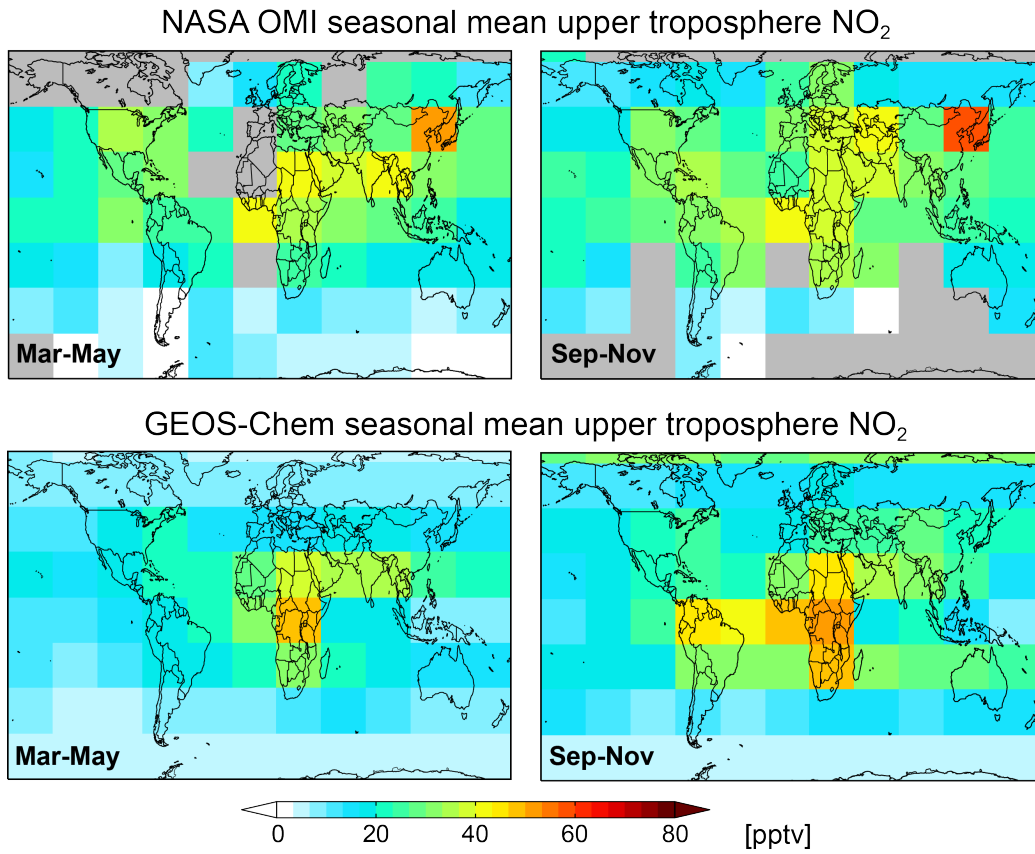

Fig. S2. Observed and modelled upper troposphere NO<sub>2</sub>. NASA OMI for 2005-2007 (top) and GEOS-Chem (bottom) seasonal mean UT NO<sub>2</sub>. The model is sampled at 280-450 hPa during the satellite overpass (12h00-15h00 LT), and filtered for stratospheric influence. Data are at 20° × 32° horizontal resolution for March-May (left) and September-November (right). Grey gridsquares in the top panel indicate no OMI data.
